# Supplementary material for: Loss of 4.1N in epithelial ovarian cancer results in EMT and matrix-detached cell death resistance
Source: PubMed Central journal article supplement (PMC7862473; doi:10.1007/s13238-020-00723-9), 2020-05-25

Supplementary Table 1. Association between 4.1N expression and clinicopathological characteristics in EOC

| Characteristics   | n=268(%)    | 4.1N expression            |                             | p value |
|-------------------|-------------|----------------------------|-----------------------------|---------|
|                   |             | Low expression<br>n=168(%) | High expression<br>n=100(%) |         |
| Age (years)       |             |                            |                             | 0.093   |
| <50               | 103(38.4)   | 58(34.5)                   | 45(45.0)                    |         |
| ≥50               | 165(61.6)   | 110(65.5)                  | 55(55.0)                    |         |
| FIGO stage        |             |                            |                             | 0.008** |
| I                 | 65(24.25%)  | 33(19.6)                   | 32(32.0)                    |         |
| II                | 31(11.57%)  | 16(9.5)                    | 15(15.0)                    |         |
| III               | 138(51.49%) | 91(54.2)                   | 47(47.0)                    |         |
| IV                | 34(12.69%)  | 28(16.7)                   | 6(6.0)                      |         |
| Tumor histology   |             |                            |                             | 0.002** |
| High-grade serous | 172(64.18%) | 121(72.0)                  | 51(51.0)                    |         |
| Low-grade serous  | 10(3.73%)   | 6(3.6)                     | 4(4.0)                      |         |
| Clear cell        | 37(13.81%)  | 18(10.7)                   | 19(19.0)                    |         |
| Endometrioid      | 36(13.43%)  | 14(8.3)                    | 22(22.0)                    |         |
| Mucinous          | 8(2.98%)    | 7(4.2)                     | 1(1.0)                      |         |
| Seromucino        | 5(1.87%)    | 2(1.2)                     | 3(3.0)                      |         |

\*\*p<0.01 represents the p-values with significant differences.

Supplementary Table 2. Primer sequences for qRT-PCR

| Gene           | Primer                                                                          |
|----------------|---------------------------------------------------------------------------------|
| 4.1N           | Forward: 5'-AGGAAACCACGCCGAGACACAA-3'<br>Reverse: 5'-GGTGGATGAGTTTGCTGTTGGG-3'  |
| E-cadherin     | Forward: 5'-ATTTTTCCCTCGACACCCGAT-3'<br>Reverse: 5'-TCCCAGGCGTAGACCAAGA-3'      |
| N-cadherin     | Forward: 5'-ACAGTGGCCACCTACAAAGG-3'<br>Reverse: 5'-CCGAGATGGGGTTGATAATG-3'      |
| ZO-1           | Forward: 5'-TATTATGGCACATCAGCACG-3'<br>Reverse: 5'-TGGGCAAACAGACCAAGC-3'        |
| Fibronectin    | Forward: 5'-TCCCTCGGAACATCAGAAAC-3'<br>Reverse: 5'-CAGTGGGAGACCTCGAGAAG-3'      |
| Snail          | Forward: 5'-TCGGAAGCCTAACTACAGCG-3'<br>Reverse: 5'-GATGAGCATTGGCAGCGAG-3'       |
| MMP2           | Forward: 5'-TTTCCATTCCGCTTCCAGGGCAC-3'<br>Reverse: 5'-TCGCACACCACATCTTTCCGTC-3' |
| Bax            | Forward: 5'-CTAAAGTGCCCGAGCTGAGCA-3'<br>Reverse: 5'-TGAGGACTCCAGCCACAAAGA-3'    |
| Bcl-2          | Forward: 5'-ATAACCGGGAGATCGTGATG-3'<br>Reverse: 5'-CAGGCTGGAAGGAGAAGATG-3'      |
| 14-3-3 $\zeta$ | Forward: 5'-CCTGCATGAAGTCTGTA-3'<br>Reverse: 5'-GACCTACGGGCTCCTACAACA-3'        |
| $\beta$ -actin | Forward: 5'-AGCACAGAGCCTCGCCTTTG-3'<br>Reverse: 5'-ACATGCCGGAGCCGTTGT-3'        |
| GAPDH          | Forward: 5'-AAGGTCGGAGTCAACGGATT-3'<br>Reverse: 5'-CCATGGGTGGAATCATATTGG-3'     |



Supplementary Table 3. Interaction proteins of 4.1N

| Accession | PROTEIN                                             | GENE     | Score  | Coverage |
|-----------|-----------------------------------------------------|----------|--------|----------|
| Q9H4G0    | 4.1N                                                | EPB41L1  | 185.15 | 40.41    |
| P06733    | Alpha-enolase                                       | ENO1     | 44.5   | 43.09    |
| Q00610    | Clathrin heavy chain 1                              | CLTC     | 44.45  | 15.76    |
| P68371    | Tubulin beta-4B chain                               | TUBB4B   | 26.49  | 34.16    |
| P60842    | Eukaryotic initiation factor 4A-I                   | EIF4A1   | 22.84  | 20.94    |
| P14625    | Endoplasmin                                         | HSP90B1  | 20.12  | 12.08    |
| P12956    | X-ray repair cross-complementing protein 6          | XRCC6    | 17.9   | 14.45    |
| P17844    | Probable ATP-dependent RNA helicase DDX5            | DDX5     | 16.59  | 11.89    |
| P10412    | Histone H1.4                                        | HIST1H1E | 14.14  | 23.29    |
| P14866    | Heterogeneous nuclear ribonucleoprotein L           | HNRNPL   | 14.09  | 14.09    |
| Q9NZI8    | Insulin-like growth factor 2 mRNA-binding protein 1 | IGF2BP1  | 12.51  | 14.9     |
| P50990    | T-complex protein 1 subunit theta                   | CCT8     | 12.05  | 11.31    |
| P27797    | Calreticulin                                        | CALR     | 11.49  | 11.75    |
| Q9UGI8    | Testin                                              | TES      | 11.22  | 13.3     |
| P23284    | Peptidyl-prolyl cis-trans isomerase B               | PPIB     | 10.93  | 22.69    |
| P26641    | Elongation factor 1-gamma                           | EEF1G    | 10.61  | 11.21    |
| P69905    | Hemoglobin subunit alpha                            | HBA1     | 10.07  | 19.01    |
| P02042    | Hemoglobin subunit delta                            | HBD      | 9.8    | 21.77    |
| P62937    | Peptidyl-prolyl cis-trans isomerase A               | PPIA     | 8.32   | 18.79    |
| Q15366    | Poly(rC)-binding protein 2                          | PCBP2    | 7.58   | 10.41    |
| P62917    | 60S ribosomal protein L8                            | RPL8     | 6.87   | 13.62    |
| Q99623    | Prohibitin-2                                        | PHB2     | 6.85   | 10.03    |
| P21796    | Voltage-dependent anion-selective channel protein 1 | VDAC1    | 6.82   | 10.25    |
| Q9H0U4    | Ras-related protein Rab-1B                          | RAB1B    | 6.76   | 14.93    |
| P62266    | 40S ribosomal protein S23                           | RPS23    | 6.68   | 15.38    |
| P63104    | 14-3-3 zeta/delta                                   | YWHAZ    | 5.95   | 22.45    |
| P61981    | 14-3-3 gamma                                        | YWHAG    | 5.63   | 12.96    |
| Q13151    | Heterogeneous nuclear ribonucleoprotein A0          | HNRNPA0  | 5.27   | 13.77    |
| P60866    | 40S ribosomal protein S20                           | RPS20    | 5.24   | 15.13    |
| Q04917    | 14-3-3 eta                                          | YWHAH    | 4.93   | 13.01    |
| P23528    | Cofilin-1                                           | CFL1     | 4.63   | 20.48    |
| P09211    | Glutathione S-transferase P                         | GSTP1    | 4.3    | 14.76    |
| P63241    | Eukaryotic translation initiation factor 5A-1       | EIF5A    | 4.09   | 20.13    |
| P35080    | Profilin-2                                          | PFN2     | 3.66   | 10       |
| P62913    | 60S ribosomal protein L11                           | RPL11    | 3.15   | 11.8     |
| P62244    | 40S ribosomal protein S15a                          | RPS15A   | 2.25   | 10.77    |
| P63220    | 40S ribosomal protein S21                           | RPS21    | 2.03   | 12.05    |
| Q9H3K6    | BolA-like protein 2                                 | BOLA2    | 0      | 18.6     |

Supplementary Table 4. 89 differential proteins in four clinical EOC samples.

| GeneID                                                                                               | log2 Ratio | Pvalue |
|------------------------------------------------------------------------------------------------------|------------|--------|
| RAB5B Ras-related protein Rab-5B                                                                     | 0.09       | 0.03   |
| S100A9 Protein S100-A9                                                                               | 0.09       | 0.00   |
| S100A9 Protein S100-A9                                                                               | 0.09       | 0.00   |
| BANF1 Barrier-to-autointegration factor                                                              | 0.10       | 0.01   |
| HBA2;HBA1 Hemoglobin subunit alpha                                                                   | 0.11       | 0.00   |
| ALB Isoform 1 of Serum albumin                                                                       | 0.11       | 0.00   |
| VTN Vitronectin                                                                                      | 0.12       | 0.00   |
| FGG Uncharacterized protein                                                                          | 0.13       | 0.00   |
| CRABP1 Cellular retinoic acid-binding protein 1                                                      | 0.14       | 0.05   |
| FGA Isoform 1 of Fibrinogen alpha chain                                                              | 0.14       | 0.00   |
| SPRR3 Uncharacterized protein                                                                        | 0.15       | 0.00   |
| FGB Fibrinogen beta chain                                                                            | 0.16       | 0.00   |
| MPO Isoform H17 of Myeloperoxidase                                                                   | 0.17       | 0.00   |
| GSTA1 Glutathione S-transferase A1                                                                   | 0.18       | 0.00   |
| AZU1 Azurocidin                                                                                      | 0.19       | 0.00   |
| SRSF3 Serine/arginine-rich splicing factor 3                                                         | 0.20       | 0.02   |
| SERPINA1 Isoform 1 of Alpha-1-antitrypsin                                                            | 0.21       | 0.00   |
| DEFA1;DEFA1B Neutrophil defensin 1                                                                   | 0.22       | 0.04   |
| C1orf31 cDNA FLJ60021, moderately similar to Protein transport protein Sec61 subunit alpha isoform 1 | 0.23       | 0.04   |
| HBB Hemoglobin subunit beta                                                                          | 0.23       | 0.00   |
| ORM1 Alpha-1-acid glycoprotein 1                                                                     | 0.24       | 0.01   |
| CLU Isoform 5 of Clusterin                                                                           | 0.25       | 0.00   |
| KRT5 Keratin, type II cytoskeletal 5                                                                 | 0.25       | 0.00   |
| KRT5 Keratin, type II cytoskeletal 5                                                                 | 0.25       | 0.00   |
| C9 Complement component C9                                                                           | 0.25       | 0.00   |
| S100A8 Protein S100-A8                                                                               | 0.26       | 0.00   |
| LTF Uncharacterized protein                                                                          | 0.26       | 0.00   |
| HP;HPR Haptoglobin                                                                                   | 0.26       | 0.00   |
| NPC2 cDNA FLJ59142, highly similar to Epididymal secretory protein E1                                | 0.26       | 0.00   |
| SERPINF2 Alpha-2-antiplasmin                                                                         | 0.28       | 0.05   |
| MAPRE1 cDNA FLJ52068, highly similar to Microtubule-associated protein RP/EB family member 1         | 0.29       | 0.02   |
| APOE Apolipoprotein E                                                                                | 0.30       | 0.00   |
| AHSG cDNA FLJ55606, highly similar to Alpha-2-HS-glycoprotein                                        | 0.30       | 0.01   |
| SLC4A1 Solute carrier family 4, anion exchanger, member 1                                            | 0.32       | 0.01   |
| FTL Ferritin light chain                                                                             | 0.32       | 0.01   |
| APOC2 Apolipoprotein C-II                                                                            | 0.34       | 0.01   |
| CTSG Cathepsin G                                                                                     | 0.35       | 0.00   |
| IGHV4-31;IGHG1 Putative uncharacterized protein DKFZp686G11190                                       | 0.35       | 0.03   |
| LCN2 Neutrophil gelatinase-associated lipocalin                                                      | 0.37       | 0.05   |
| TXN Thioredoxin                                                                                      | 0.38       | 0.00   |

Supplementary Table 4. 89 differential proteins in four clinical EOC samples.

| GeneID                                                                       | log2 Ratio | Pvalue |
|------------------------------------------------------------------------------|------------|--------|
| PLG Plasminogen                                                              | 0.38       | 0.00   |
| GPX1 Glutathione peroxidase 1                                                | 0.39       | 0.04   |
| LGALS3BP Galectin-3-binding protein                                          | 0.39       | 0.01   |
| SRSF9 Serine/arginine-rich splicing factor 9                                 | 0.41       | 0.00   |
| HBD Hemoglobin subunit delta                                                 | 0.42       | 0.03   |
| RPL18A 60S ribosomal protein L18a                                            | 0.42       | 0.00   |
| LYZ Lysozyme C                                                               | 0.43       | 0.01   |
| HINT1 Histidine triad nucleotide-binding protein 1                           | 0.44       | 0.04   |
| RPS17;RPS17L 40S ribosomal protein S17                                       | 0.45       | 0.01   |
| TCEB2 Transcription elongation factor B polypeptide 2                        | 0.46       | 0.01   |
| RPLP0 60S acidic ribosomal protein P0                                        | 0.46       | 0.02   |
| UCHL1 Ubiquitin carboxyl-terminal hydrolase isozyme L1                       | 0.46       | 0.04   |
| APOA1 Apolipoprotein A-I                                                     | 0.46       | 0.00   |
| PKM2 Isoform M2 of Pyruvate kinase isozymes M1/M2                            | 0.47       | 0.00   |
| - Transthyretin                                                              | 0.48       | 0.01   |
| TF Serotransferrin                                                           | 0.49       | 0.04   |
| SOD1 Superoxide dismutase [Cu-Zn]                                            | 0.50       | 0.05   |
| GAPDH Glyceraldehyde-3-phosphate dehydrogenase                               | 0.51       | 0.02   |
| TRMT112 tRNA methyltransferase 112 homolog                                   | 0.52       | 0.03   |
| RPL35A 60S ribosomal protein L35a                                            | 0.52       | 0.01   |
| DHX15 Uncharacterized protein                                                | 0.54       | 0.02   |
| PRKCSH glucosidase 2 subunit beta isoform 2                                  | 0.55       | 0.03   |
| RBMX Heterogeneous nuclear ribonucleoprotein G                               | 0.55       | 0.00   |
| FN1 Isoform 15 of Fibronectin                                                | 0.56       | 0.00   |
| STMN1 Isoform 1 of Stathmin                                                  | 0.58       | 0.04   |
| C3 Complement C3 (Fragment)                                                  | 0.61       | 0.00   |
| A1BG Isoform 1 of Alpha-1B-glycoprotein                                      | 0.61       | 0.03   |
| COL6A1 Collagen alpha-1(VI) chain                                            | 1.66       | 0.01   |
| COL1A1 Collagen alpha-1(I) chain                                             | 1.71       | 0.00   |
| THBS1 Thrombospondin-1                                                       | 1.74       | 0.01   |
| AHNAK Neuroblast differentiation-associated protein AHNAK                    | 1.80       | 0.00   |
| LMNA Isoform A of Prelamin-A/C                                               | 1.82       | 0.01   |
| DES Desmin                                                                   | 1.87       | 0.03   |
| DCN Isoform A of Decorin                                                     | 1.94       | 0.01   |
| COL6A3 Isoform 1 of Collagen alpha-3(VI) chain                               | 2.00       | 0.00   |
| OGN cDNA FLJ59205, highly similar to Mimecan                                 | 2.15       | 0.02   |
| COL6A2 Isoform 2C2 of Collagen alpha-2(VI) chain                             | 2.25       | 0.01   |
| MZB1 Isoform 1 of Plasma cell-induced resident endoplasmic reticulum protein | 2.25       | 0.01   |
| COL14A1 Isoform 2 of Collagen alpha-1(XIV) chain                             | 2.40       | 0.00   |
| PSMB8 30 kDa protein                                                         | 2.51       | 0.04   |

Supplementary Table 4. 89 differential proteins in four clinical EOC samples.

| GeneID                                         | log2 Ratio | Pvalue |
|------------------------------------------------|------------|--------|
| KRT7 Keratin, type II cytoskeletal 7           | 2.65       | 0.00   |
| KRT10 Keratin, type I cytoskeletal 10          | 2.70       | 0.00   |
| S100A6 Protein S100-A6                         | 2.70       | 0.02   |
| COL1A2 Collagen alpha-2(I) chain               | 3.02       | 0.00   |
| ANXA4 annexin A4                               | 3.05       | 0.00   |
| KRT2 Keratin, type II cytoskeletal 2 epidermal | 3.05       | 0.00   |
| KRT9 Keratin, type I cytoskeletal 9            | 3.25       | 0.00   |
| KRT1 Keratin, type II cytoskeletal 1           | 3.40       | 0.00   |
| MTDH Uncharacterized protein                   | 3.87       | 0.05   |

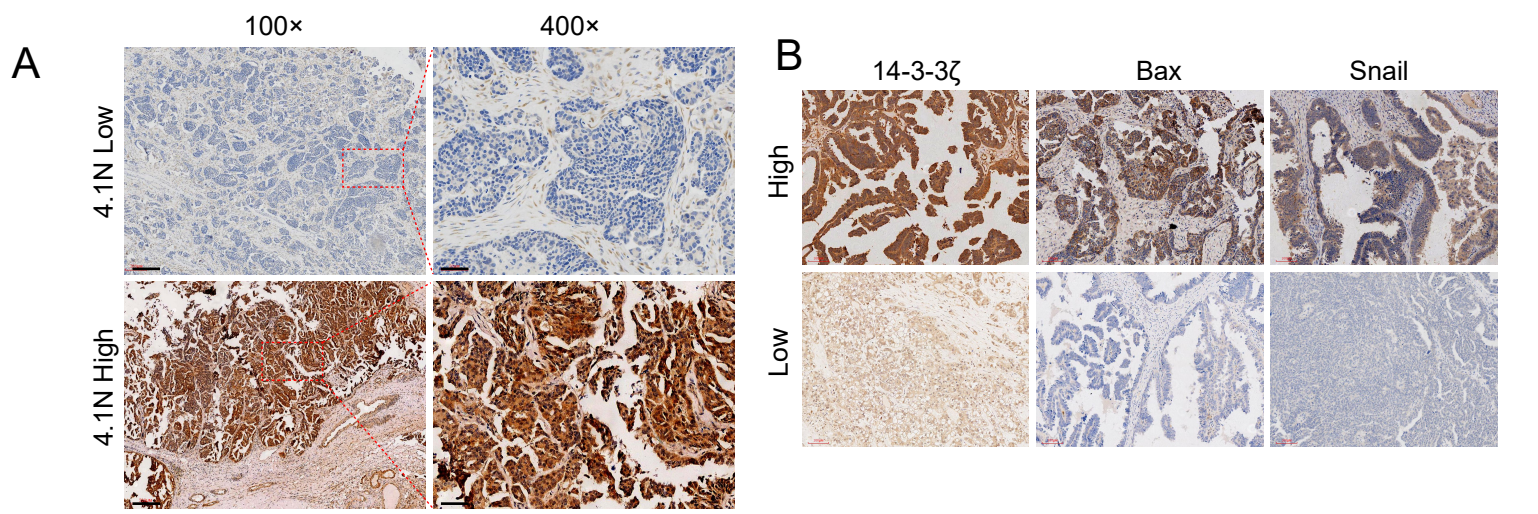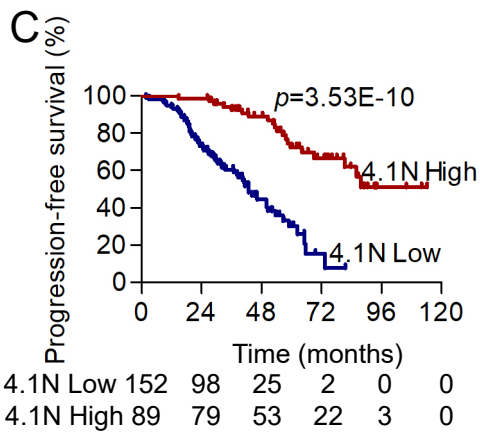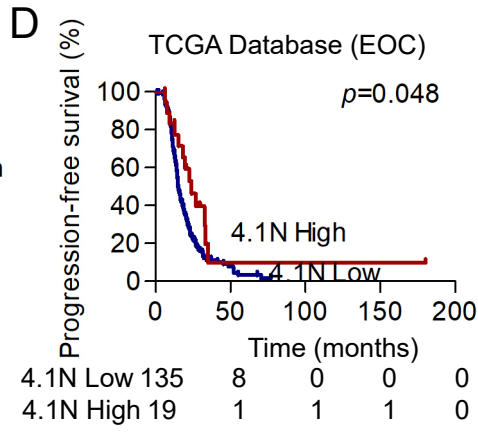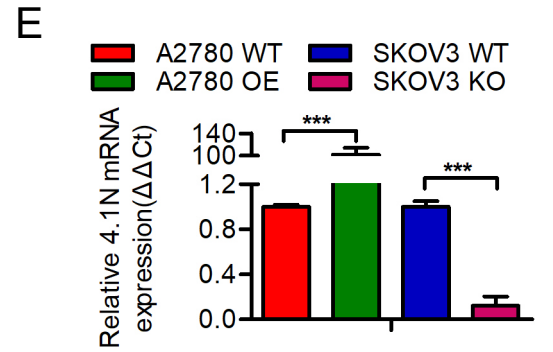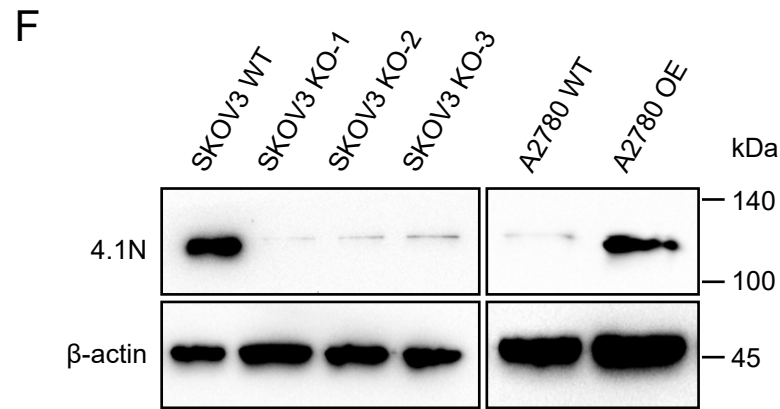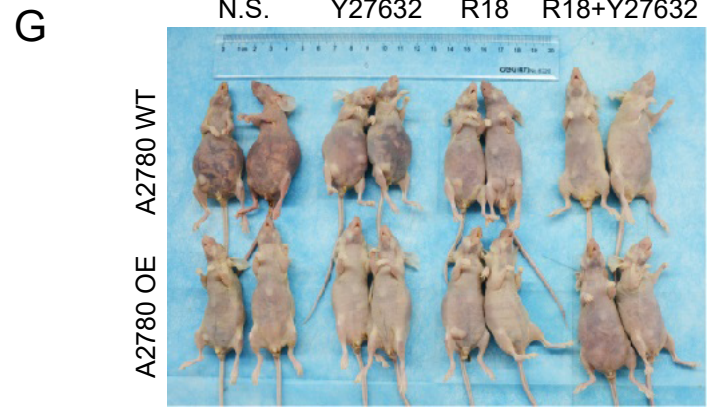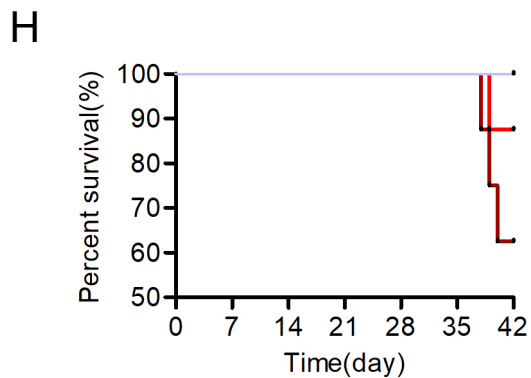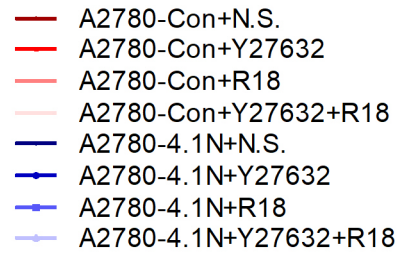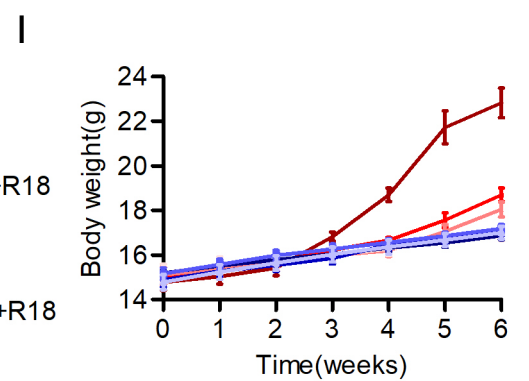



A

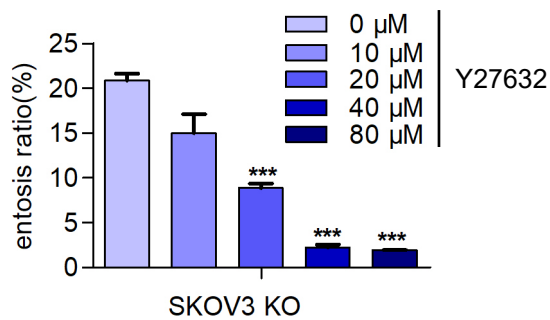

B

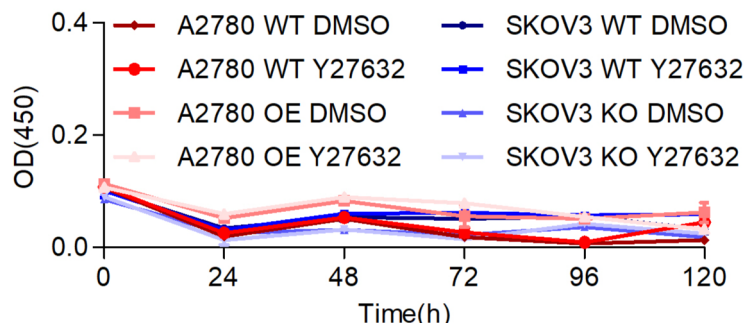

C

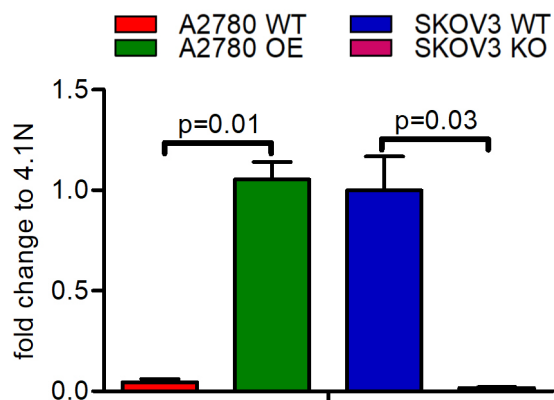

D

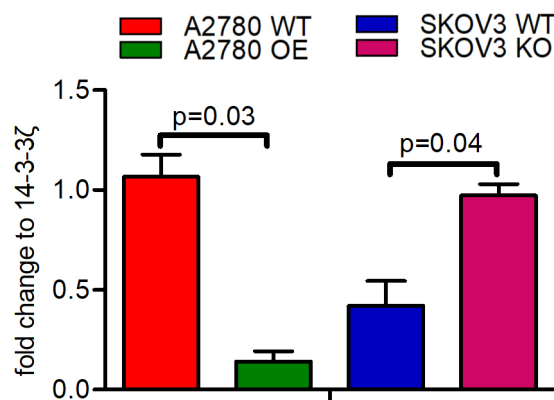

E

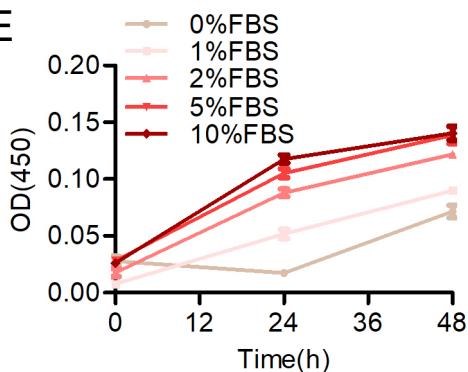

F

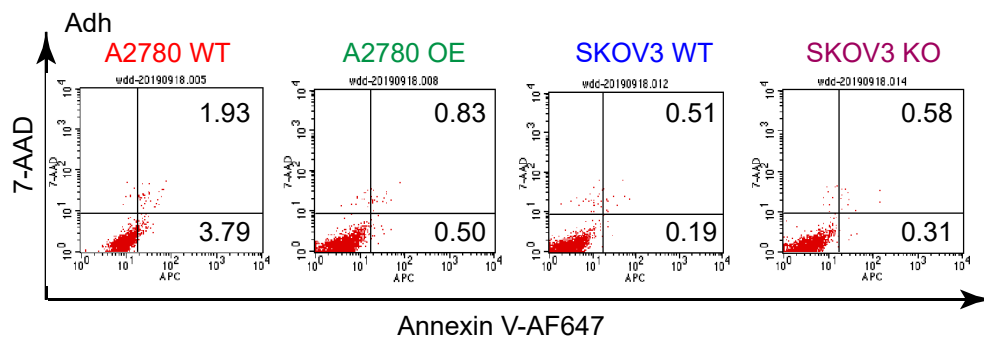

G

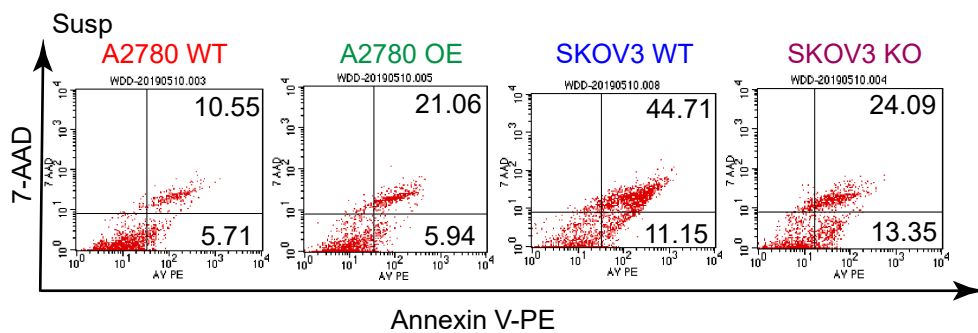

H

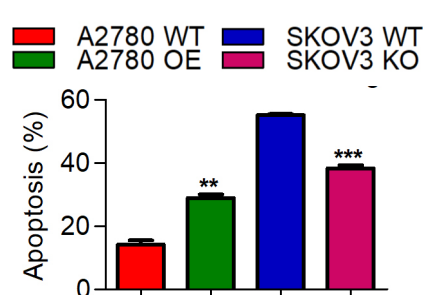

I

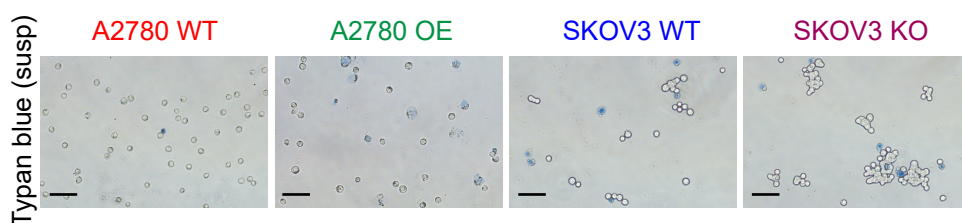

J

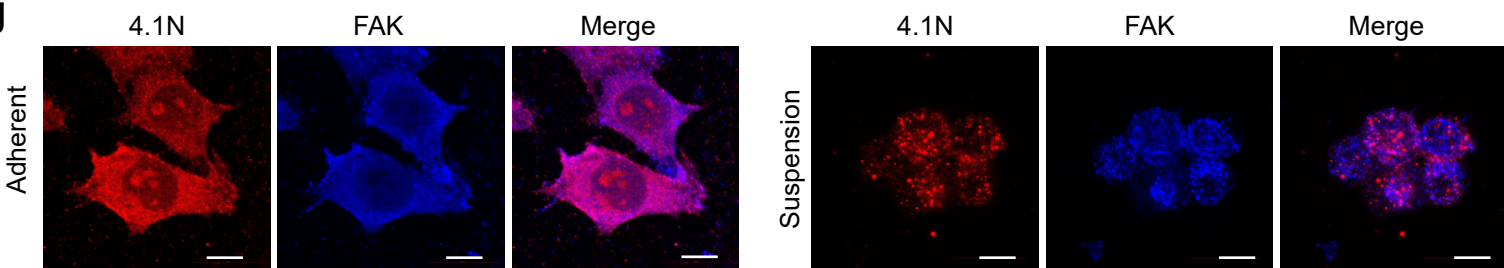

A

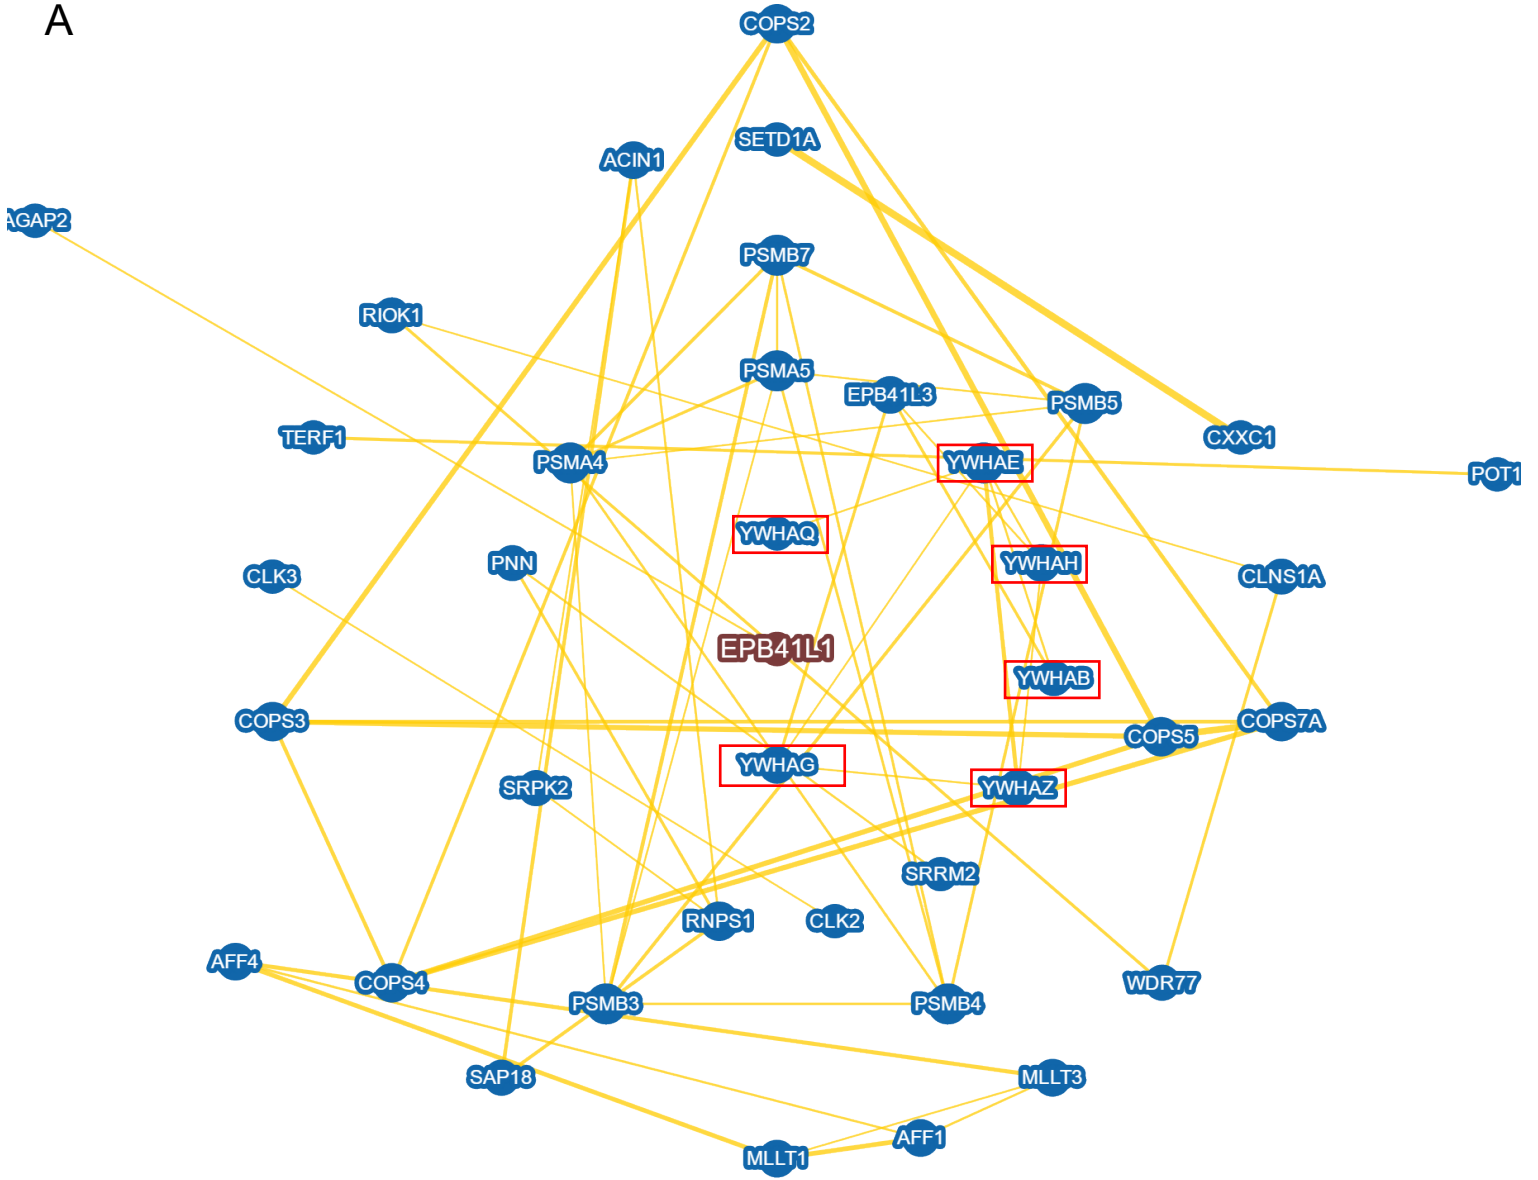

B

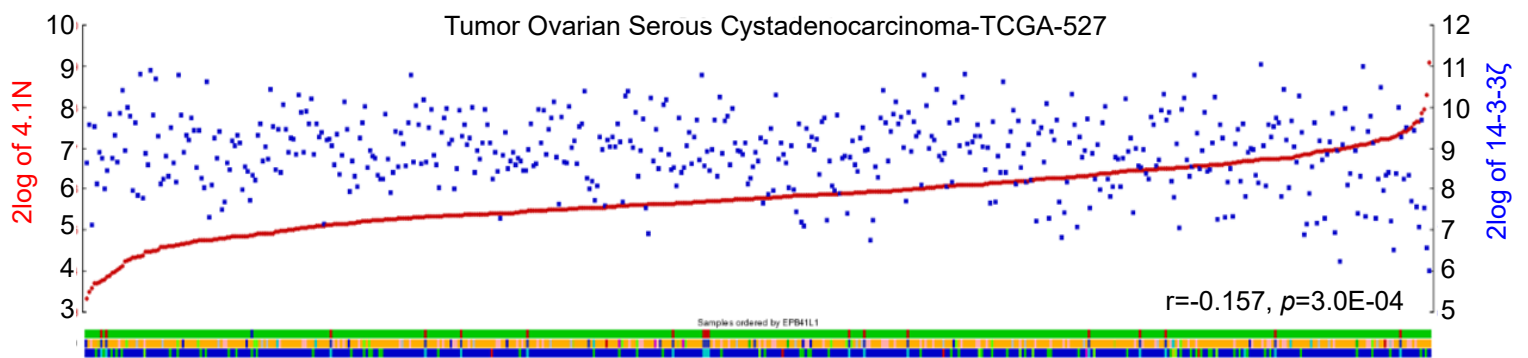

Supplement: 13238_2020_723_MOESM1_ESM.pdf [file 13238_2020_723_MOESM1_ESM.pdf]
